# Supplementary material for: A review found inadequate reporting of case–control studies of risk factors for pancreatic cancer
Source: J Clin Epidemiol. 2021 May;133:32–42. doi: 10.1016/j.jclinepi.2020.12.020 (PMC8168827; doi:10.1016/j.jclinepi.2020.12.020)
Supplement: Appendix C [file mmc4.pdf]

|                           | STROBE item number |                                                                                                                                                                               | STROBE item reported in<br>sufficient detail to be reproduced | STROBE item reported <b>BUT NOT</b><br>in sufficient detail to be | STROBE item<br><b>NOT reported at all</b> | UNSURE (about the information<br>reported) | Not applicable | Page No/Table No |
|---------------------------|--------------------|-------------------------------------------------------------------------------------------------------------------------------------------------------------------------------|---------------------------------------------------------------|-------------------------------------------------------------------|-------------------------------------------|--------------------------------------------|----------------|------------------|
| <b>Title and abstract</b> | <b>1a</b>          | Did the authors indicate the study's design with a commonly used term in the title or the abstract?                                                                           |                                                               |                                                                   |                                           |                                            |                |                  |
|                           | <b>1b</b>          | Did the authors provide in the abstract an informative and balanced summary of what was done?                                                                                 |                                                               |                                                                   |                                           |                                            |                |                  |
|                           |                    | Did the authors provide in the abstract an informative and balanced summary of what was found?                                                                                |                                                               |                                                                   |                                           |                                            |                |                  |
| <b>Methods</b>            | <b>4</b>           | Did the authors present key elements of study design early in the paper?                                                                                                      |                                                               |                                                                   |                                           |                                            |                |                  |
|                           | <b>5</b>           | <b>Did the authors describe:</b>                                                                                                                                              |                                                               |                                                                   |                                           |                                            |                |                  |
|                           |                    | The study setting? <i>Information about setting includes recruitment sites or sources e.g., electoral roll, outpatient clinic, cancer registry, or tertiary care centre .</i> |                                                               |                                                                   |                                           |                                            |                |                  |
|                           |                    | The study locations? <i>For example: Information about location may refer to the countries, towns, hospitals or practices where the investigation took place.</i>             |                                                               |                                                                   |                                           |                                            |                |                  |
|                           | <b>5</b>           | <b>The relevant dates:</b>                                                                                                                                                    |                                                               |                                                                   |                                           |                                            |                |                  |
|                           |                    | The period of recruitment?                                                                                                                                                    |                                                               |                                                                   |                                           |                                            |                |                  |
|                           |                    | The period of exposure?                                                                                                                                                       |                                                               |                                                                   |                                           |                                            |                |                  |
|                           |                    | The period of data-collection?                                                                                                                                                |                                                               |                                                                   |                                           |                                            |                |                  |
|                           | <b>6a</b>          | <b>Did the authors give:</b>                                                                                                                                                  |                                                               |                                                                   |                                           |                                            |                |                  |
|                           |                    | The eligibility criteria for <b>cases</b> ?                                                                                                                                   |                                                               |                                                                   |                                           |                                            |                |                  |
|                           |                    | The <b>source</b> of <b>cases</b> ? <i>For example a cancer registry or hospital records</i>                                                                                  |                                                               |                                                                   |                                           |                                            |                |                  |

|            |                                                                                          |  |  |  |  |  |  |
|------------|------------------------------------------------------------------------------------------|--|--|--|--|--|--|
|            | The <b>methods</b> of <b>case ascertainment</b> ?                                        |  |  |  |  |  |  |
|            | The rationale for the choice of <b>cases</b> ?                                           |  |  |  |  |  |  |
|            | <b>Did the authors give:</b>                                                             |  |  |  |  |  |  |
|            | The eligibility criteria for <b>controls</b> ?                                           |  |  |  |  |  |  |
|            | The <b>source</b> of <b>controls</b> ? <i>For example hospital records</i>               |  |  |  |  |  |  |
|            | The <b>methods</b> of <b>control selection</b> ?                                         |  |  |  |  |  |  |
|            | The rationale for the choice of <b>controls</b> ?                                        |  |  |  |  |  |  |
| <b>6b</b>  | <b>For matched studies, did the authors give:</b>                                        |  |  |  |  |  |  |
|            | The matching criteria?                                                                   |  |  |  |  |  |  |
|            | The number of <b>controls</b> per <b>case</b> ?                                          |  |  |  |  |  |  |
| <b>7</b>   | <b>Did the authors clearly define</b>                                                    |  |  |  |  |  |  |
|            | All the outcomes?                                                                        |  |  |  |  |  |  |
|            | All exposures evaluated?                                                                 |  |  |  |  |  |  |
|            | All potential confounders?                                                               |  |  |  |  |  |  |
| <b>8</b>   | <b>For cases for each variable of interest did the author give:</b>                      |  |  |  |  |  |  |
|            | Sources of data?                                                                         |  |  |  |  |  |  |
|            | Details of methods of assessment (measurement)?                                          |  |  |  |  |  |  |
|            | <b>For controls for each variable of interest did the author give:</b>                   |  |  |  |  |  |  |
|            | Sources of data?                                                                         |  |  |  |  |  |  |
|            | Details of methods of assessment (measurement)?                                          |  |  |  |  |  |  |
| <b>9</b>   | Did the authors describe any efforts to address potential sources of bias?               |  |  |  |  |  |  |
| <b>10</b>  | Did the authors explain how the study size was arrived at?                               |  |  |  |  |  |  |
| <b>11</b>  | Did the authors explain how quantitative variables were handled in the analyses?         |  |  |  |  |  |  |
|            | <b>If applicable, did the authors describe:</b>                                          |  |  |  |  |  |  |
|            | Which groupings were chosen?                                                             |  |  |  |  |  |  |
|            | Why groupings were chosen?                                                               |  |  |  |  |  |  |
| <b>12a</b> | <b>Did the authors describe:</b>                                                         |  |  |  |  |  |  |
|            | All statistical methods?                                                                 |  |  |  |  |  |  |
|            | Statistical methods....used to control for confounding?                                  |  |  |  |  |  |  |
| <b>12b</b> | <b>Did the authors describe</b>                                                          |  |  |  |  |  |  |
| <b>12c</b> | Did the authors explain how missing data were addressed?                                 |  |  |  |  |  |  |
| <b>12d</b> | If applicable, did the authors explain how matching of cases and controls was addressed? |  |  |  |  |  |  |

|  |            |                                                                                                                |  |  |  |  |  |  |
|--|------------|----------------------------------------------------------------------------------------------------------------|--|--|--|--|--|--|
|  | <b>13a</b> | <b>For cases, did the authors report numbers of individuals at each stage of study:</b>                        |  |  |  |  |  |  |
|  |            | e.g. numbers potentially eligible?                                                                             |  |  |  |  |  |  |
|  |            | Numbers examined for eligibility?                                                                              |  |  |  |  |  |  |
|  |            | Numbers confirmed eligible?                                                                                    |  |  |  |  |  |  |
|  |            | Numbers included in the study?                                                                                 |  |  |  |  |  |  |
|  |            | Numbers analysed?                                                                                              |  |  |  |  |  |  |
|  |            | <b>For controls, did the authors report numbers of individuals at each stage of study:</b>                     |  |  |  |  |  |  |
|  |            | e.g. numbers potentially eligible?                                                                             |  |  |  |  |  |  |
|  |            | Numbers examined for eligibility?                                                                              |  |  |  |  |  |  |
|  |            | Numbers confirmed eligible?                                                                                    |  |  |  |  |  |  |
|  |            | Numbers included in the study?                                                                                 |  |  |  |  |  |  |
|  |            | Numbers analysed?                                                                                              |  |  |  |  |  |  |
|  | <b>13b</b> | For cases, did the authors give reasons for non-participation at each stage?                                   |  |  |  |  |  |  |
|  | <b>13b</b> | For controls, did the authors give reasons for non-participation at each stage?                                |  |  |  |  |  |  |
|  | <b>13c</b> | Did the authors include a flow diagram?                                                                        |  |  |  |  |  |  |
|  | <b>14a</b> | <b>For cases, did the authors give characteristics of study participants:</b>                                  |  |  |  |  |  |  |
|  |            | e.g. demographic, clinical, social details?                                                                    |  |  |  |  |  |  |
|  |            | Information on exposures?                                                                                      |  |  |  |  |  |  |
|  |            | Information on potential confounders?                                                                          |  |  |  |  |  |  |
|  |            | <b>For controls, did the authors give characteristics of study participants:</b>                               |  |  |  |  |  |  |
|  |            | e.g. demographic, clinical, social details?                                                                    |  |  |  |  |  |  |
|  |            | Information on exposures?                                                                                      |  |  |  |  |  |  |
|  |            | Information on potential confounders?                                                                          |  |  |  |  |  |  |
|  | <b>14b</b> | For cases, did the authors indicate number of participants with missing data for each variable of interest?    |  |  |  |  |  |  |
|  |            | For controls, did the authors indicate number of participants with missing data for each variable of interest? |  |  |  |  |  |  |
|  | <b>15</b>  | For cases, did the authors report numbers in each exposure category, or summary measures of exposure?          |  |  |  |  |  |  |
|  |            | For controls, did the authors report numbers in each exposure category, or summary measures of exposure?       |  |  |  |  |  |  |

|  |            |                                                                                                            |  |  |  |  |  |  |
|--|------------|------------------------------------------------------------------------------------------------------------|--|--|--|--|--|--|
|  | <b>16a</b> | Did the authors give unadjusted estimates?                                                                 |  |  |  |  |  |  |
|  |            | Did the authors report precision for unadjusted estimates? (e.g., 95% confidence interval)?                |  |  |  |  |  |  |
|  |            | If applicable, did the authors give confounder-adjusted estimates?                                         |  |  |  |  |  |  |
|  |            | If applicable, did the authors report precision for confounder-estimates? (e.g., 95% confidence interval)? |  |  |  |  |  |  |
|  |            | Did the authors make clear which confounders were adjusted for?                                            |  |  |  |  |  |  |
|  |            | Did the authors make clear why confounders were included?                                                  |  |  |  |  |  |  |
|  | <b>16b</b> | Did the authors report category boundaries when continuous variables were categorized?                     |  |  |  |  |  |  |
